# Supplementary material for: Monitoring the Landscape Pattern Dynamics and Driving Forces in Dongting Lake Wetland in China Based on Landsat Images
Source: MDPI journal article supplement (doi:10.3390/w16091273), 2024-04-29
Supplement: s1 [file s1]

---

**Table S1:** Transition matrix of Dongting Lake wetland landscape area from 1991 to 2022 (km<sup>2</sup>).

| time interval | landscape type | mudflat | water  | reed   | sedge  | woodland | total  |
|---------------|----------------|---------|--------|--------|--------|----------|--------|
| 1991-2001     | mudflat        | 13.05   | 5.25   | 5.24   | 6.98   | 0.49     | 31.01  |
|               | reed           | 2.56    | 68.10  | 19.38  | 1.34   | 1.2      | 92.65  |
|               | sedge          | 2.14    | 30.74  | 27.20  | 1.64   | 1.25     | 62.96  |
|               | water          | 15.18   | 2.29   | 1.71   | 71.19  | 0.31     | 90.69  |
|               | woodland       | 1.55    | 4.68   | 4.53   | 3.03   | 2.18     | 15.96  |
|               | total          | 34.48   | 111.07 | 58.06  | 84.17  | 5.50     | 293.28 |
| 2001-2004     | mudflat        | 43.26   | 17.77  | 19.77  | 16.40  | 17.74    | 114.93 |
|               | reed           | 7.33    | 247.97 | 87.16  | 1.40   | 26.37    | 370.23 |
|               | sedge          | 2.43    | 54.83  | 114.20 | 1.17   | 20.92    | 193.54 |
|               | water          | 30.20   | 6.69   | 8.58   | 213.80 | 21.29    | 280.56 |
|               | woodland       | 0.28    | 3.70   | 6.80   | 0.36   | 7.21     | 18.35  |
|               | total          | 83.50   | 330.95 | 236.51 | 233.1  | 93.53    | 977.61 |
| 2004-2022     | mudflat        | 3.32    | 5.86   | 1.68   | 2.57   | 0.48     | 13.92  |
|               | reed           | 0.98    | 6.29   | 31.86  | 10.96  | 5.08     | 55.16  |
|               | sedge          | 0.40    | 4.16   | 8.56   | 23.29  | 3.00     | 39.42  |
|               | water          | 5.96    | 30.16  | 1.38   | 0.97   | 0.37     | 38.85  |
|               | woodland       | 0.65    | 4.28   | 3.99   | 5.20   | 1.46     | 15.59  |
|               | total          | 11.32   | 50.75  | 47.47  | 43.00  | 10.39    | 162.93 |

---
